# Supplementary material for: FluBreaks: Early Epidemic Detection from Google Flu Trends
Source: PubMed Central journal article supplement (PMC3510767; doi:10.2196/jmir.2102), 2012-10-04
Supplement: jmir_v14i5e125_app1.pdf [file jmir_v14i5e125_app1.pdf]

**Multimedia Appendix 1: Ranking of algorithms in different parameters of evaluation for HSS Region 4 (Highest Population)**

| Percentage of True Positive |               |       | Percentage of False Positive |               |       | Percentage of Overlap |               |       | Percentage of Early Alarm |               |       | Overall Position of Algorithm |               |       |
|-----------------------------|---------------|-------|------------------------------|---------------|-------|-----------------------|---------------|-------|---------------------------|---------------|-------|-------------------------------|---------------|-------|
| Pos                         | Algorithm     | Value | Pos                          | Algorithm     | Value | Pos                   | Algorithm     | Value | Pos                       | Algorithm     | Value | Pos                           | Algorithm     | Value |
| 1                           | C1 - cut:2 b4 | 100   | 1                            | C2 - cut:6 b4 | 0     | 1                     | NBC - cut 8   | 81    | 1                         | NBC - cut 8   | 88    | 1                             | NBC - cut 15  | 85    |
| 1                           | C2 - cut:2 b4 | 100   | 1                            | HLM 3         | 0     | 1                     | NBC - cut 15  | 81    | 1                         | NBC - cut 15  | 88    | 1                             | NBC - cut 8   | 85    |
| 1                           | C3 - cut:2 b4 | 100   | 1                            | HLM 5         | 0     | 2                     | NBC - 1k      | 70    | 2                         | C3 - cut:2 b4 | 75    | 2                             | C3 - cut:2 b4 | 78    |
| 1                           | C2 - cut:4 b4 | 100   | 2                            | H-Cusum       | 10    | 2                     | PSC - 1k      | 70    | 2                         | C3 - cut:2 b8 | 75    | 2                             | C3 - cut:2 b8 | 78    |
| 1                           | C3 - cut:4 b4 | 100   | 2                            | HNBC          | 10    | 3                     | NBC - 1.5k    | 60    | 2                         | POD           | 75    | 2                             | NBC - 1k      | 78    |
| 1                           | C2 - cut:6 b4 | 100   | 2                            | NBC - 1.5k    | 10    | 3                     | PSC - 1.5k    | 60    | 2                         | NBC - 1k      | 75    | 2                             | POD           | 78    |
| 1                           | C3 - cut:6 b4 | 100   | 2                            | PSC - 1.5k    | 10    | 4                     | POD           | 58    | 2                         | PSC - 1k      | 75    | 2                             | PSC - 1k      | 78    |
| 1                           | C1 - cut:2 b8 | 100   | 2                            | C1 - cut:2 b4 | 10    | 5                     | Satscan       | 52    | 3                         | NBC - 1.5k    | 63    | 3                             | NBC - 1.5k    | 77    |
| 1                           | C2 - cut:2 b8 | 100   | 2                            | C2 - cut:4 b4 | 10    | 6                     | HNBC          | 35    | 3                         | PSC - 1.5k    | 63    | 3                             | PSC - 1.5k    | 77    |
| 1                           | C3 - cut:2 b8 | 100   | 2                            | C3 - cut:4 b4 | 10    | 7                     | C3 - cut:2 b8 | 31    | 3                         | C2 - cut:2 b4 | 63    | 4                             | C2 - cut:2 b4 | 72    |
| 1                           | C2 - cut:4 b8 | 100   | 2                            | C3 - cut:6 b4 | 10    | 8                     | C3 - cut:2 b4 | 30    | 3                         | C2 - cut:2 b8 | 63    | 4                             | C2 - cut:2 b8 | 72    |
| 1                           | C3 - cut:4 b8 | 100   | 2                            | C1 - cut:2 b8 | 10    | 9                     | C2 - cut:2 b4 | 27    | 4                         | C3 - cut:4 b4 | 38    | 5                             | Satscan       | 71    |
| 1                           | Satscan       | 100   | 2                            | C2 - cut:4 b8 | 10    | 10                    | H-Cusum       | 26    | 4                         | C1 - cut:2 b8 | 38    | 6                             | C1 - cut:2 b8 | 64    |
| 1                           | POD           | 100   | 2                            | C3 - cut:4 b8 | 10    | 11                    | HLM 5         | 24    | 4                         | C3 - cut:4 b8 | 38    | 6                             | C3 - cut:4 b4 | 64    |
| 1                           | NBC - cut 8   | 100   | 2                            | Satscan       | 10    | 12                    | C2 - cut:2 b8 | 23    | 5                         | C1 - cut:2 b4 | 25    | 6                             | C3 - cut:4 b8 | 64    |
| 1                           | NBC - cut 15  | 100   | 3                            | NBC - 1k      | 20    | 12                    | HLM 3         | 23    | 6                         | HLM 3         | 20    | 7                             | C1 - cut:2 b4 | 58    |
| 1                           | NBC - 1k      | 100   | 3                            | PSC - 1k      | 20    | 13                    | C3 - cut:4 b4 | 19    | 6                         | HLM 5         | 20    | 7                             | HNBC          | 58    |
| 1                           | NBC - 1.5k    | 100   | 3                            | C2 - cut:2 b4 | 20    | 14                    | C3 - cut:4 b8 | 17    | 7                         | HNBC          | 13    | 8                             | C2 - cut:6 b4 | 57    |
| 1                           | PSC - 1k      | 100   | 3                            | C3 - cut:2 b4 | 20    | 15                    | C2 - cut:4 b4 | 16    | 7                         | C2 - cut:4 b4 | 13    | 9                             | C2 - cut:4 b4 | 53    |
| 1                           | PSC - 1.5k    | 100   | 3                            | C2 - cut:2 b8 | 20    | 16                    | C1 - cut:2 b4 | 15    | 7                         | C2 - cut:6 b4 | 13    | 10                            | C2 - cut:4 b8 | 52    |
| 2                           | HNBC          | 80    | 3                            | C3 - cut:2 b8 | 20    | 17                    | C1 - cut:2 b8 | 13    | 7                         | C3 - cut:6 b4 | 13    | 10                            | C3 - cut:6 b4 | 52    |
| 3                           | HLM 3         | 60    | 3                            | POD           | 20    | 18                    | C2 - cut:4 b8 | 12    | 7                         | C2 - cut:4 b8 | 13    | 11                            | H-Cusum       | 43    |
| 3                           | HLM 5         | 60    | 4                            | NBC - cut 8   | 30    | 19                    | C3 - cut:6 b4 | 11    | 7                         | Satscan       | 13    | 12                            | HLM 5         | 42    |
| 3                           | H-Cusum       | 60    | 4                            | NBC - cut 15  | 30    | 20                    | C2 - cut:6 b4 | 9     | 7                         | H-Cusum       | 13    | 12                            | HLM 3         | 42    |

**Note:** Value of Percentage of True Positive (RTP) and Percentage of False Positive (RFP) are rounded off to the nearest ten.
