# Supplementary material for: FluBreaks: Early Epidemic Detection from Google Flu Trends
Source: PubMed Central journal article supplement (PMC3510767; doi:10.2196/jmir.2102), 2012-10-04
Supplement: jmir_v14i5e125_app2.pdf [file jmir_v14i5e125_app2.pdf]

**Multimedia Appendix 2: Ranking of algorithms in different parameters of evaluation for HSS Region 6 (Lowest Percent Internet Use)**

| Percentage of True Positive |               |       | Percentage of False Positive |               |       | Percentage of Overlap |               |       | Percentage of Early Alarm |               |       | Overall Position of Algorithm |               |       |
|-----------------------------|---------------|-------|------------------------------|---------------|-------|-----------------------|---------------|-------|---------------------------|---------------|-------|-------------------------------|---------------|-------|
| Pos                         | Algorithm     | Value | Pos                          | Algorithm     | Value | Pos                   | Algorithm     | Value | Pos                       | Algorithm     | Value | Pos                           | Algorithm     | Value |
| 1                           | C1 - cut:2 b4 | 100   | 1                            | C2 - cut:6 b4 | 0     | 1                     | NBC - cut 8   | 76    | 1                         | NBC - cut 8   | 88    | 1                             | NBC - cut 15  | 82    |
| 1                           | C2 - cut:2 b4 | 100   | 1                            | HLM 3         | 0     | 1                     | NBC - cut 15  | 76    | 1                         | NBC - cut 15  | 88    | 1                             | NBC - cut 8   | 82    |
| 1                           | C3 - cut:2 b4 | 100   | 1                            | H-Cusum       | 0     | 2                     | NBC - 1k      | 63    | 2                         | POD           | 75    | 2                             | NBC - 1.5k    | 78    |
| 1                           | C2 - cut:4 b4 | 100   | 1                            | C3 - cut:6 b4 | 0     | 3                     | PSC - 1k      | 62    | 2                         | NBC - 1k      | 75    | 2                             | NBC - 1k      | 78    |
| 1                           | C3 - cut:4 b4 | 100   | 2                            | HNBC          | 10    | 4                     | NBC - 1.5k    | 55    | 2                         | PSC - 1k      | 75    | 2                             | POD           | 78    |
| 1                           | C3 - cut:2 b8 | 100   | 2                            | C2 - cut:4 b4 | 10    | 5                     | PSC - 1.5k    | 53    | 2                         | NBC - 1.5k    | 75    | 2                             | PSC - 1.5k    | 78    |
| 1                           | Satscan       | 100   | 2                            | Satscan       | 10    | 5                     | Satscan       | 53    | 2                         | PSC - 1.5k    | 75    | 2                             | PSC - 1k      | 78    |
| 1                           | POD           | 100   | 2                            | HLM 5         | 10    | 6                     | POD           | 50    | 3                         | C3 - cut:2 b4 | 50    | 3                             | Satscan       | 72    |
| 1                           | NBC - cut 8   | 100   | 2                            | C1 - cut:2 b4 | 10    | 7                     | HNBC          | 34    | 4                         | C2 - cut:2 b8 | 43    | 4                             | C2 - cut:2 b8 | 65    |
| 1                           | NBC - cut 15  | 100   | 2                            | C1 - cut:2 b8 | 10    | 8                     | H-Cusum       | 27    | 4                         | C3 - cut:4 b8 | 43    | 4                             | C3 - cut:4 b8 | 65    |
| 1                           | NBC - 1k      | 100   | 2                            | C2 - cut:4 b8 | 10    | 9                     | HLM 5         | 26    | 5                         | C1 - cut:2 b4 | 38    | 4                             | C3 - cut:2 b4 | 65    |
| 1                           | PSC - 1k      | 100   | 2                            | C3 - cut:4 b4 | 10    | 11                    | HLM 3         | 22    | 5                         | C2 - cut:2 b4 | 38    | 5                             | C1 - cut:2 b4 | 64    |
| 2                           | NBC - 1.5k    | 88    | 2                            | C3 - cut:4 b8 | 10    | 12                    | C3 - cut:2 b4 | 19    | 5                         | C2 - cut:4 b4 | 38    | 5                             | C2 - cut:2 b4 | 64    |
| 2                           | PSC - 1.5k    | 88    | 2                            | C2 - cut:2 b8 | 10    | 12                    | C3 - cut:2 b8 | 19    | 5                         | C3 - cut:4 b4 | 38    | 5                             | C2 - cut:4 b4 | 64    |
| 2                           | C2 - cut:6 b4 | 88    | 2                            | C2 - cut:2 b4 | 10    | 13                    | C2 - cut:2 b4 | 17    | 5                         | C3 - cut:2 b8 | 38    | 5                             | C3 - cut:4 b4 | 64    |
| 2                           | C3 - cut:6 b4 | 88    | 3                            | NBC - 1.5k    | 20    | 13                    | C2 - cut:2 b8 | 17    | 5                         | HNBC          | 38    | 6                             | C3 - cut:2 b8 | 59    |
| 2                           | C1 - cut:2 b8 | 88    | 3                            | PSC - 1.5k    | 20    | 14                    | C1 - cut:2 b4 | 12    | 5                         | H-Cusum       | 38    | 7                             | C1 - cut:2 b8 | 58    |
| 2                           | C2 - cut:2 b8 | 88    | 3                            | C3 - cut:2 b4 | 20    | 14                    | C3 - cut:4 b4 | 12    | 6                         | C1 - cut:2 b8 | 29    | 7                             | C2 - cut:4 b8 | 58    |
| 2                           | C2 - cut:4 b8 | 88    | 3                            | POD           | 20    | 14                    | C3 - cut:4 b8 | 12    | 6                         | C2 - cut:4 b8 | 29    | 8                             | HNBC          | 57    |
| 2                           | C3 - cut:4 b8 | 88    | 3                            | C3 - cut:2 b8 | 20    | 15                    | C1 - cut:2 b8 | 11    | 7                         | Satscan       | 25    | 9                             | C3 - cut:6 b4 | 47    |
| 3                           | HNBC          | 75    | 3                            | NBC - 1k      | 20    | 16                    | C2 - cut:4 b4 | 10    | 8                         | HLM 3         | 20    | 9                             | C2 - cut:6 b4 | 47    |
| 4                           | HLM 3         | 63    | 3                            | PSC - 1k      | 20    | 17                    | C2 - cut:4 b8 | 9     | 8                         | HLM 5         | 20    | 10                            | HLM 5         | 44    |
| 4                           | HLM 5         | 63    | 4                            | NBC - cut 8   | 40    | 18                    | C3 - cut:6 b4 | 7     | 9                         | C2 - cut:6 b4 | 0     | 10                            | H-Cusum       | 44    |
| 5                           | H-Cusum       | 50    | 4                            | NBC - cut 15  | 40    | 19                    | C2 - cut:6b4  | 6     | 9                         | C3 - cut:6 b4 | 0     | 11                            | HLM 3         | 42    |

**Note:** Value of Percentage of True Positive (RTP) and Percentage of False Positive (RFP) are rounded off to the nearest ten.
