# Supplementary material for: FluBreaks: Early Epidemic Detection from Google Flu Trends
Source: J Med Internet Res. 2012 Oct 4;14(5):e125. doi: 10.2196/jmir.2102 (PMC3510767; doi:10.2196/jmir.2102)
Supplement: Supplementary file 3 [file jmir_v14i5e125_app3.pdf]

Multimedia Appendix 3: Ranking of algorithms in different parameters of evaluation for HSS Region 10 (Lowest Population and Highest Percent Internet Use)

| Percentage of True Positive |               |       | Percentage of False Positive |               |       | Percentage of Overlap |               |       | Percentage of Early Alarm |               |       | Overall Position of Algorithm |               |       |
|-----------------------------|---------------|-------|------------------------------|---------------|-------|-----------------------|---------------|-------|---------------------------|---------------|-------|-------------------------------|---------------|-------|
| Pos                         | Algorithm     | Value | Pos                          | Algorithm     | Value | Pos                   | Algorithm     | Value | Pos                       | Algorithm     | Value | Pos                           | Algorithm     | Value |
| 1                           | C1 - cut:2 b4 | 100   | 1                            | H-Cusum       | 0     | 1                     | NBC - cut 8   | 82    | 1                         | NBC - cut 8   | 71    | 1                             | Satscan       | 77    |
| 1                           | C2 - cut:2 b4 | 100   | 1                            | HNBC          | 0     | 1                     | NBC - cut 15  | 82    | 1                         | NBC - cut 15  | 71    | 1                             | NBC - cut 15  | 77    |
| 1                           | C3 - cut:2 b4 | 100   | 1                            | HLM 3         | 0     | 2                     | NBC - 1k      | 68    | 1                         | NBC - 1k      | 71    | 1                             | NBC - cut 8   | 77    |
| 1                           | C2 - cut:4 b4 | 100   | 1                            | HLM 5         | 0     | 2                     | PSC - 1k      | 68    | 2                         | POD           | 57    | 2                             | POD           | 74    |
| 1                           | C3 - cut:4 b4 | 100   | 1                            | C2 - cut:6 b4 | 0     | 2                     | Satscan       | 68    | 2                         | C3 - cut:2 b4 | 57    | 3                             | NBC - 1.5k    | 71    |
| 1                           | C1 - cut:2 b8 | 100   | 2                            | C1 - cut:2 b4 | 10    | 2                     | POD           | 68    | 2                         | C3 - cut:2 b8 | 57    | 3                             | PSC - 1.5k    | 71    |
| 1                           | C2 - cut:2 b8 | 100   | 2                            | C2 - cut:4 b4 | 10    | 3                     | NBC - 1.5k    | 62    | 2                         | PSC - 1k      | 57    | 3                             | NBC - 1k      | 71    |
| 1                           | C3 - cut:4 b8 | 100   | 2                            | C3 - cut:4 b4 | 10    | 3                     | PSC - 1.5k    | 62    | 2                         | NBC - 1.5k    | 57    | 4                             | HNBC          | 70    |
| 1                           | C3 - cut:2 b8 | 100   | 2                            | C3 - cut:6 b4 | 10    | 4                     | HNBC          | 54    | 2                         | PSC - 1.5k    | 57    | 5                             | PSC - 1k      | 69    |
| 1                           | POD           | 100   | 2                            | C1 - cut:2 b8 | 10    | 5                     | H-Cusum       | 35    | 3                         | C1 - cut:2 b4 | 43    | 5                             | C3 - cut:2 b4 | 69    |
| 1                           | NBC - cut 8   | 100   | 2                            | C2 - cut:2 b8 | 10    | 6                     | C3 - cut:2 b4 | 34    | 3                         | C2 - cut:2 b4 | 43    | 5                             | C3 - cut:2 b8 | 69    |
| 1                           | NBC - cut 15  | 100   | 2                            | C2 - cut:4 b8 | 10    | 7                     | C3 - cut:2 b8 | 33    | 3                         | C3 - cut:4 b4 | 43    | 6                             | C1 - cut:2 b4 | 67    |
| 1                           | NBC - 1k      | 100   | 2                            | C3 - cut:4 b8 | 10    | 8                     | HLM 3         | 32    | 3                         | C1 - cut:2 b8 | 43    | 6                             | C1 - cut:2 b8 | 67    |
| 1                           | PSC - 1k      | 100   | 2                            | Satscan       | 10    | 8                     | HLM 5         | 32    | 3                         | C2 - cut:2 b8 | 43    | 6                             | C2 - cut:2 b8 | 67    |
| 1                           | NBC - 1.5k    | 100   | 3                            | PSC - 1.5k    | 20    | 10                    | C2 - cut:2 b4 | 28    | 3                         | C3 - cut:4 b8 | 43    | 6                             | C3 - cut:4 b4 | 67    |
| 1                           | PSC - 1.5k    | 100   | 3                            | NBC - 1.5k    | 20    | 11                    | C2 - cut:2 b8 | 25    | 4                         | H-Cusum       | 29    | 6                             | C3 - cut:4 b8 | 67    |
| 2                           | HNBC          | 86    | 3                            | C2 - cut:2 b4 | 20    | 12                    | C3 - cut:4 b4 | 18    | 4                         | C2 - cut:4 b4 | 29    | 7                             | C2 - cut:2 b4 | 62    |
| 2                           | C3 - cut:6 b4 | 86    | 3                            | C3 - cut:2 b4 | 20    | 13                    | C2 - cut:4 b4 | 16    | 4                         | C3 - cut:6 b4 | 29    | 8                             | C2 - cut:4 b4 | 60    |
| 2                           | C2 - cut:4 b8 | 86    | 3                            | C3 - cut:2 b8 | 20    | 14                    | C1 - cut:2 b4 | 14    | 4                         | C2 - cut:4 b8 | 29    | 9                             | C2 - cut:4 b8 | 57    |
| 2                           | Satscan       | 86    | 3                            | POD           | 20    | 14                    | C3 - cut:4 b8 | 14    | 4                         | HLM 3         | 29    | 9                             | C3 - cut:6 b4 | 57    |
| 3                           | H-Cusum       | 71    | 4                            | NBC - 1k      | 30    | 15                    | C1 - cut:2 b8 | 12    | 5                         | HNBC          | 14    | 10                            | H-Cusum       | 53    |
| 3                           | C2 - cut:6 b4 | 71    | 4                            | PSC - 1k      | 30    | 16                    | C3 - cut:6 b4 | 10    | 5                         | C2 - cut:6 b4 | 14    | 11                            | HLM 5         | 45    |
| 4                           | HLM 5         | 57    | 5                            | NBC - cut 8   | 40    | 17                    | C2 - cut:4 b4 | 9     | 5                         | Satscan       | 14    | 12                            | C2 - cut:6 b4 | 43    |
| 5                           | HLM 3         | 43    | 5                            | NBC - cut 15  | 40    | 17                    | C2 - cut:6 b4 | 9     | 5                         | HLM 5         | 14    | 13                            | HLM 3         | 37    |

**Note:** Value of Percentage of True Positive (RTP) and Percentage of False Positive (RFP) are rounded off to the nearest ten.
